# Supplementary material for: A Liposome-Based Approach to the Integrated Multi-Component Antigen Microarrays
Source: Microarrays (Basel). 2015 Nov 20;4(4):618–29. doi: 10.3390/microarrays4040618 (PMC4996415; doi:10.3390/microarrays4040618)
Supplement: Supplementary File 1 [file microarrays-04-00618-s001.xlsx]

## Sheet: Supp1
	Supplementary Table S1. Antigen Preparations Used in This Study
	Antigen Index	Antigen name	Antgen preparations	Item description	Source	References
	1	Ceramide 1_5	Ceramide, 2.0mg/ml, 1:5 dil. In Saline	Ceramide (Brain, Porcine)	Avanti Polar lipids, Alabaster, AL	Wang, et al., Drug Dev. Res. 75:172-188, (2014)
	2	Ceramide	Ceramide, 2.0mg/ml	Ceramide (Brain, Porcine)	Avanti Polar lipids, Alabaster, AL	Wang, et al., Drug Dev. Res. 75:172-188, (2014)
	3	Ganglioside 1_5	Ganglioside, 2.0mg/ml, 1:5 dil. In Saline	Total Ganglioside-Ammonium Salt, (Brain, Porcine)	Avanti Polar lipids, Alabaster, AL	Wang, et al., Drug Dev. Res. 75:172-188, (2014)
	4	Ganglioside	Ganglioside, 2.0mg/ml	Total Ganglioside-Ammonium Salt, (Brain, Porcine)	Avanti Polar lipids, Alabaster, AL	Wang, et al., Drug Dev. Res. 75:172-188, (2014)
	5	DIMPS 1_5	DIMPS, 2mg/ml, 1:5 dil. In Saline	1,2-Dimyristoyl-sn-Glycero—3—[phospho-L—serine](Sodium Salt) (DMPS)	Avanti Polar lipids, Alabaster, AL	Wang, et al., Drug Dev. Res. 75:172-188, (2014)
	6	DIMPS	DIMPS, 2mg/ml	1,2-Dimyristoyl-sn-Glycero—3—[phospho-L—serine](Sodium Salt) (DMPS)	Avanti Polar lipids, Alabaster, AL	Wang, et al., Drug Dev. Res. 75:172-188, (2014)
	7	Sulfatide 1_5	Sulfatide, 2.0mg/ml , 1:5 dil. In Saline	Sufatides (Cerebroside sulfates), (Brain, Porcine)	Avanti Polar lipids, Alabaster, AL	Wang, et al., Drug Dev. Res. 75:172-188, (2014)
	8	Sulfatide	Sulfatide, 2.0mg/ml	Sufatides (Cerebroside sulfates), (Brain, Porcine)	Avanti Polar lipids, Alabaster, AL	Wang, et al., Drug Dev. Res. 75:172-188, (2014)
	9	PTC 1_5	PTC 2.0 mg/ml, 4°C, 24 hrs, 1:5 dil. In Saline	L-a-Phosphatidylcholine (Egg, Chicken)	Avanti Polar lipids, Alabaster, AL	Wang, et al., Drug Dev. Res. 75:172-188, (2014)
	10	PTC	PTC 2.0 mg/ml, 4°C, 24 hrs	L-a-Phosphatidylcholine (Egg, Chicken)	Avanti Polar lipids, Alabaster, AL	Wang, et al., Drug Dev. Res. 75:172-188, (2014)
	11	Ganglioside/PTC_1/10 1_5	Ganglioside/PTC, 0.2mg/2mg/ml, 4°C, 24 hrs, 1:5 dil. In Saline	Total Ganglioside Extract (Brain, Porcine-Ammnium Salt)	Avanti Polar lipids, Alabaster, AL	Wang, et al., Drug Dev. Res. 75:172-188, (2014)
	12	Ganglioside/PTC_1/10	Ganglioside/PTC, 0.2mg/2mg/ml, 4°C, 24 hrs	Total Ganglioside Extract (Brain, Porcine-Ammnium Salt)	Avanti Polar lipids, Alabaster, AL	Wang, et al., Drug Dev. Res. 75:172-188, (2014)
	13	Erythrosphingosine/PTC_1/10 1_5	Erythrosphingosine/PTC, 0.2mg/2.0mg/ml, 4°C, 24 hrs , 1:5 dil. In Saline	D-erythro- Sphingosine (Egg, Chicken)	Avanti Polar lipids, Alabaster, AL	Wang, et al., Drug Dev. Res. 75:172-188, (2014)
	14	Erythrosphingosine/PTC_1/10	Erythrosphingosine/PTC, 0.2mg/2.0mg/ml, 4°C, 24 hrs	D-erythro- Sphingosine (Egg, Chicken)	Avanti Polar lipids, Alabaster, AL	Wang, et al., Drug Dev. Res. 75:172-188, (2014)
	15	Phytosphingosine/PTC_1/10 1_5	Phytosphingosine/PTC, 0.2mg/2.0mg/ml, 4°C, 24 hrs , 1:5 dil. In Saline	Phytosphingosine 4-Hydroxysphinganine (Saccharomyces cervisiae)	Avanti Polar lipids, Alabaster, AL	Wang, et al., Drug Dev. Res. 75:172-188, (2014)
	16	Phytosphingosine/PTC_1/10	Phytosphingosine/PTC, 0.2mg/2.0mg/ml, 4°C, 24 hrs	Phytosphingosine 4-Hydroxysphinganine (Saccharomyces cervisiae)	Avanti Polar lipids, Alabaster, AL	Wang, et al., Drug Dev. Res. 75:172-188, (2014)
	17	Glucocerebroside/PTC_1/10 1_5	Glucocerebroside/PTC, 0.2mg/2mg/ml, 4°C, 24 hrs , 1:5 dil. In Saline	Glucocerebrosides (Soy, 98%)	Avanti Polar lipids, Alabaster, AL	Wang, et al., Drug Dev. Res. 75:172-188, (2014)
	18	Glucocerebroside/PTC_1/10	Glucocerebroside/PTC, 0.2mg/2mg/ml, 4°C, 24 hrs	Glucocerebrosides (Soy, 98%)	Avanti Polar lipids, Alabaster, AL	Wang, et al., Drug Dev. Res. 75:172-188, (2014)
	19	Sulfatide/PTC_1/10 1_5	Sulfatide/PTC, 0.2mg/2.0mg/ml, 4°C, 24 hrs , 1:5 dil. In Saline	Sufatides (Cerebroside sulfates) (Brain, Porcine)	Avanti Polar lipids, Alabaster, AL	Wang, et al., Drug Dev. Res. 75:172-188, (2014)
	20	Sulfatide/PTC_1/10	Sulfatide/PTC, 0.2mg/2.0mg/ml, 4°C, 24 hrs	Sufatides (Cerebroside sulfates) (Brain, Porcine)	Avanti Polar lipids, Alabaster, AL	Wang, et al., Drug Dev. Res. 75:172-188, (2014)
	21	Ceramide/PTC_1/10 1_5	Ceramide/PTC, 0.2mg/2.0mg/ml, 4°C, 24 hrs , 1:5 dil. In Saline	Ceramide (Brain, Porcine)	Avanti Polar lipids, Alabaster, AL	Wang, et al., Drug Dev. Res. 75:172-188, (2014)
	22	Ceramide/PTC_1/10	Ceramide/PTC, 0.2mg/2.0mg/ml, 4°C, 24 hrs	Ceramide (Brain, Porcine)	Avanti Polar lipids, Alabaster, AL	Wang, et al., Drug Dev. Res. 75:172-188, (2014)
	23	Cerebroside/PTC_1/10 1_5	Cerebroside/PTC, 0.2mg/2.0mg/ml, 4°C, 24 hrs , 1:5 dil. In Saline	Total Cerebrosides (Brain, Porcine)	Avanti Polar lipids, Alabaster, AL	Wang, et al., Drug Dev. Res. 75:172-188, (2014)
	24	Cerebroside/PTC_1/10	Cerebroside/PTC, 0.2mg/2.0mg/ml, 4°C, 24 hrs	Total Cerebrosides (Brain, Porcine)	Avanti Polar lipids, Alabaster, AL	Wang, et al., Drug Dev. Res. 75:172-188, (2014)
	25	DMPS/PTC_1/10 1_5	DMPS/PTC, 0.2mg/2.0mg/ml, 4°C, 24 hrs , 1:5 dil. In Saline	1,2-Dimyristoyl-sn-Glycero—3—[phospho-L—serine](Sodium Salt) (DMPS)	Avanti Polar lipids, Alabaster, AL	Wang, et al., Drug Dev. Res. 75:172-188, (2014)
	26	DMPS/PTC_1/10	DMPS/PTC, 0.2mg/2.0mg/ml, 4°C, 24 hrs	1,2-Dimyristoyl-sn-Glycero—3—[phospho-L—serine](Sodium Salt) (DMPS)	Avanti Polar lipids, Alabaster, AL	Wang, et al., Drug Dev. Res. 75:172-188, (2014)
	27	Cardiolipin/PTC-1/20 1_5	Cardiolipin/PTC, 0.1mg/2mg/ml, 4°C, 24 hrs , 1:5 dil. In Saline	Cardiolipin-Disodium Salt (heart, bovin)	Sigma Chemical Co., St. Louis, MO	Wang, et al., Drug Dev. Res. 75:172-188, (2014)
	28	Cardiolipin/PTC-1/20	Cardiolipin/PTC, 0.1mg/2mg/ml, 4°C, 24 hrs	Cardiolipin-Disodium Salt (heart, bovin)	Sigma Chemical Co., St. Louis, MO	Wang, et al., Drug Dev. Res. 75:172-188, (2014)
	29	Cardiolipin/PTC-1/5_1_5	Cardiolipin/PTC, 0.4mg/2mg/ml, 4°C, 24 hrs , 1:5 dil. In Saline	Cardiolipin-Disodium Salt (heart, bovin)	Sigma Chemical Co., St. Louis, MO	Wang, et al., Drug Dev. Res. 75:172-188, (2014)
	30	Cardiolipin/PTC-1/5	Cardiolipin/PTC, 0.4mg/2mg/ml, 4°C, 24 hrs	Cardiolipin-Disodium Salt (heart, bovin)	Sigma Chemical Co., St. Louis, MO	Wang, et al., Drug Dev. Res. 75:172-188, (2014)
	31	GM1/PTC_1/100 1_5	GM1/PTC, 0.02mg/2mg/ml, 4°C, 24 hrs , 1:5 dil. In Saline	GM1 Ganglioside-Sodium Salt (Brain, Ovine)	Avanti Polar lipids, Alabaster, AL	Wang, et al., Drug Dev. Res. 75:172-188, (2014)
	32	GM1/PTC_1/100	GM1/PTC, 0.02mg/2mg/ml, 4°C, 24 hrs	GM1 Ganglioside-Sodium Salt (Brain, Ovine)	Avanti Polar lipids, Alabaster, AL	Wang, et al., Drug Dev. Res. 75:172-188, (2014)
	33	GM1/PTC_1/10 1_5	GM1/PTC, 2mg/2mg/ml, 4°C, 14 Months , 1:5 dil. In Saline	GM1 Ganglioside-Sodium Salt (Brain, Ovine)	Avanti Polar lipids, Alabaster, AL	Wang, et al., Drug Dev. Res. 75:172-188, (2014)
	34	GM1/PTC_1/10	GM1/PTC, 2mg/2mg/ml, 4°C, 14 Months	GM1 Ganglioside-Sodium Salt (Brain, Ovine)	Avanti Polar lipids, Alabaster, AL	Wang, et al., Drug Dev. Res. 75:172-188, (2014)
	35	PTC_4M 1_5	PTC 2.0 mg/ml, 4°C, 4 Months , 1:5 dil. In Saline	L-a-Phosphatidylcholine (Egg, Chicken)	Avanti Polar lipids, Alabaster, AL	Wang, et al., Drug Dev. Res. 75:172-188, (2014)
	36	PTC_4M	PTC 2.0 mg/ml, 4°C, 4 Months	L-a-Phosphatidylcholine (Egg, Chicken)	Avanti Polar lipids, Alabaster, AL	Wang, et al., Drug Dev. Res. 75:172-188, (2014)
	37	Cardiolipin/PTC_1/100 4M 1_5	Cardiolipin/PTC, 0.02mg/2mg/ml, 4°C, 4 Months , 1:5 dil. In Saline	Cardiolipin (C1649)	Sigma Chemical Co., St. Louis, MO	Wang, et al., Drug Dev. Res. 75:172-188, (2014)
	38	Cardiolipin/PTC_1/100 4M	Cardiolipin/PTC, 0.02mg/2mg/ml, 4°C, 4 Months	Cardiolipin (C1649)	Sigma Chemical Co., St. Louis, MO	Wang, et al., Drug Dev. Res. 75:172-188, (2014)
	39	Cardiolipin/PTC-1/20 4M 1_5	Cardiolipin/PTC, 0.1mg/2mg/ml, 4°C, 4 Months , 1:5 dil. In Saline	Cardiolipin-Disodium Salt (heart, bovin)	Sigma Chemical Co., St. Louis, MO	Wang, et al., Drug Dev. Res. 75:172-188, (2014)
	40	Cardiolipin/PTC-1/20 4M	Cardiolipin/PTC, 0.1mg/2mg/ml, 4°C, 4 Months	Cardiolipin-Disodium Salt (heart, bovin)	Sigma Chemical Co., St. Louis, MO	Wang, et al., Drug Dev. Res. 75:172-188, (2014)
	41	Cardiolipin/PTC-1/5 4M 1_5	Cardiolipin/PTC, 0.4mg/2mg/ml, 4°C, 4 Months , 1:5 dil. In Saline	Cardiolipin-Disodium Salt (heart, bovin)	Sigma Chemical Co., St. Louis, MO	Wang, et al., Drug Dev. Res. 75:172-188, (2014)
	42	Cardiolipin/PTC-1/5 4M	Cardiolipin/PTC, 0.4mg/2mg/ml, 4°C, 4 Months	Cardiolipin-Disodium Salt (heart, bovin)	Sigma Chemical Co., St. Louis, MO	Wang, et al., Drug Dev. Res. 75:172-188, (2014)
	43	PTC_12M 1_5	PTC 2.0 mg/ml, 4°C, 12 Months , 1:5 dil. In Saline	L-a-Phosphatidylcholine (Egg, Chicken)	Avanti Polar lipids, Alabaster, AL	Wang, et al., Drug Dev. Res. 75:172-188, (2014)
	44	PTC_12M	PTC 2.0 mg/ml, 4°C, 12 Months	L-a-Phosphatidylcholine (Egg, Chicken)	Avanti Polar lipids, Alabaster, AL	Wang, et al., Drug Dev. Res. 75:172-188, (2014)
	45	aGal-T2/PTC_1/50 1_5	Galal,3Galb1-*HDPE/PTC, 0.04mg/2mg/ml, 4°C, 12 Months, 1:5 dil. In Saline	Galal,3Galb1-HDPE (aGal-terminal di-saccharides)	V-LABS, INC, Louisiana, US	Wang, et al., Drug Dev. Res. 75:172-188, (2014)
	46	aGal-T2/PTC_1/50	Galal,3Galb1-*HDPE/PTC, 0.04mg/2mg/ml, 4°C, 12 Months	Galal,3Galb1-HDPE (aGal-terminal di-saccharides)	V-LABS, INC, Louisiana, US	Wang, et al., Drug Dev. Res. 75:172-188, (2014)
	47	Lactosamine/PTC 1_5	Galbl,4GlcNACb1-HDPE/PTC, 4°C, 12 Months, 1:5 dil. In Saline	Galbl,4GlcNACb1-HDPE (Type II chain unit)	V-LABS, INC, Louisiana, US	Wang, et al., Drug Dev. Res. 75:172-188, (2014)
	48	Lactosamine/PTC	Galbl,4GlcNACb1-HDPE/PTC, 4°C, 12 Months	Galbl,4GlcNACb1-HDPE (Type II chain unit)	V-LABS, INC, Louisiana, US	Wang, et al., Drug Dev. Res. 75:172-188, (2014)
	49	aGal-T3/PTC 1_5	Galal,3Galbl,4GlcNACb1-HDPE/PTC, 4°C, 12 Months , 1:5 dil. In Saline	Galal,3Galbl,4GlcNACbl-(aGal-terminal tri-saccharides)-HDPE	V-LABS, INC, Louisiana, US	Wang, et al., Drug Dev. Res. 75:172-188, (2014)
	50	aGal-T3/PTC	Galal,3Galbl,4GlcNACb1-HDPE/PTC, 4°C, 12 Months	Galal,3Galbl,4GlcNACbl-(aGal-terminal tri-saccharides)-HDPE	V-LABS, INC, Louisiana, US	Wang, et al., Drug Dev. Res. 75:172-188, (2014)
	51	PTC_14M 1_5	PTC 2.0 mg/ml, 4°C, 14 Months, 1:5 dil. In Saline	L-a-Phosphatidylcholine (Egg, Chicken)	Avanti Polar lipids, Alabaster, AL	Wang, et al., Drug Dev. Res. 75:172-188, (2014)
	52	PTC_14M	PTC 2.0 mg/ml, 4°C, 14 Months	L-a-Phosphatidylcholine (Egg, Chicken)	Avanti Polar lipids, Alabaster, AL	Wang, et al., Drug Dev. Res. 75:172-188, (2014)
	53	Man5_6-RB 1_5	Man 5-6 RB, 0.5mg/ml , 1:5 dil. In Saline	Ribonuclease B with Man5-6GlcNAc2Asn as the main glycans (pancreas, bovine)	Sigma-Aldrich	Wang, et al., Drug Dev. Res. 75:172-188, (2014)
	54	Man5_6-RB	Man 5-6 RB, 0.5mg/ml	Ribonuclease B with Man5-6GlcNAc2Asn as the main glycans (pancreas, bovine)	Sigma-Aldrich	Wang, et al., Drug Dev. Res. 75:172-188, (2014)
	55	M9(2G12) 1_5	Man9-Cluster(2G12)-KLH, 0.5mg/ml , 1:5 dil. In Saline	[(Man9GlcNAc2Asn)4]n-KLH	From Prof. Lai-Xi Wang (University of Maryland)	Ni et al., Bioconjug Chem., 17:493-500 (2006)
	56	M9(2G12)	Man9-Cluster(2G12)-KLH, 0.5mg/ml	[(Man9GlcNAc2Asn)4]n-KLH	From Prof. Lai-Xi Wang (University of Maryland)	Ni et al., Bioconjug Chem., 17:493-500 (2006)
	57	Man9 1_5	Man9-KLH, 0.5mg/ml , 1:5 dil. In Saline	(Man9GlcNAc2Asn)n-KLH	From Prof. Lai-Xi Wang (University of Maryland)	Ni et al., Bioconjug Chem., 17:493-500 (2006)
	58	Man9	Man9-KLH, 0.5mg/ml	(Man9GlcNAc2Asn)n-KLH	From Prof. Lai-Xi Wang (University of Maryland)	Ni et al., Bioconjug Chem., 17:493-500 (2006)
	59	AGOR 1_5	AGOR, 0.5mg/ml , 1:5 dil. In Saline	Agalacto-orosomucoid	From the late Prof. Elvin A. Kabat (Columbia University)	Wang & Lu, Physiol Genomics 18(2):245-8, (2004)
	60	AGOR	AGOR, 0.5mg/ml	Agalacto-orosomucoid	From the late Prof. Elvin A. Kabat (Columbia University)	Wang & Lu, Physiol Genomics 18(2):245-8, (2004)
	61	ASOR 1_5	ASOR, 0.5mg/ml , 1:5 dil. In Saline	Asialo-orosomucoid	From the late Prof. Elvin A. Kabat (Columbia University)	Wang & Lu, Physiol Genomics 18(2):245-8, (2004)
	62	ASOR	ASOR, 0.5mg/ml	Asialo-orosomucoid	From the late Prof. Elvin A. Kabat (Columbia University)	Wang & Lu, Physiol Genomics 18(2):245-8, (2004)
	63	OR 1_5	OR, 0.5mg/ml , 1:5 dil. In Saline	Orosomucoid (human a1-acid glycoprotein)	Sigma-Aldrich	Wang & Lu, Physiol Genomics 18(2):245-8, (2004)
	64	OR	OR, 0.5mg/ml	Orosomucoid (human a1-acid glycoprotein)	Sigma-Aldrich	Wang & Lu, Physiol Genomics 18(2):245-8, (2004)
	65	N279 1_5	N279, 0.5mg/ml , 1:5 dil. In Saline	α(1→6)dextran, NRRL N279	Northern Regional research laboratory, (Peoria, IL) NRRL B-2448	Wang, et al., Nat Biotechnol 20(3):275-81, (2002)
	66	N279	N279, 0.5mg/ml	α(1→6)dextran, NRRL N279	Northern Regional research laboratory, (Peoria, IL) NRRL B-2448	Wang, et al., Nat Biotechnol 20(3):275-81, (2002)
	67	B1299S 1_5	B1299S, 0.5mg/ml , 1:5 dil. In Saline	α(1→6)dextran, NRRL B-1299S	Northern Regional research laboratory, (Peoria, IL) NRRL B-2448	Wang, et al., Nat Biotechnol 20(3):275-81, (2002)
	68	B1299S	B1299S, 0.5mg/ml	α(1→6)dextran, NRRL B-1299S	Northern Regional research laboratory, (Peoria, IL) NRRL B-2448	Wang, et al., Nat Biotechnol 20(3):275-81, (2002)
	69	B1355S 1_5	B1355S, 0.5mg/ml , 1:5 dil. In Saline	α(1→3)(1→6)dextran, NRRL B-1355S	Northern Regional research laboratory, (Peoria, IL) NRRL B-2448	Wang, et al., Nat Biotechnol 20(3):275-81, (2002)
	70	B1355S	B1355S, 0.5mg/ml	α(1→3)(1→6)dextran, NRRL B-1355S	Northern Regional research laboratory, (Peoria, IL) NRRL B-2448	Wang, et al., Nat Biotechnol 20(3):275-81, (2002)
	71	B2448 1_5	B2448, 0.5mg/ml , 1:5 dil. In Saline	Phosphomannan, NRRL B-2448	Northern Regional research laboratory, (Peoria, IL) NRRL B-2448	Kabat et al., J. Exp. Med. 164, 642 (1986)
	72	B2448	B2448, 0.5mg/ml	Phosphomannan, NRRL B-2448	Northern Regional research laboratory, (Peoria, IL) NRRL B-2448	Kabat et al., J. Exp. Med. 164, 642 (1986)
	73	Levan 1_5	Levan, 0.5mg/ml, 1:5 dil. In Saline	Levan (from preparation of B-512-E dextran)	Commercial Solvents Co. (Terre Haute, IN)	Kabat et al., J. Exp. Med. 164, 642 (1986)
	74	Levan	Levan, 0.5mg/ml	Levan (from preparation of B-512-E dextran)	Commercial Solvents Co. (Terre Haute, IN)	Kabat et al., J. Exp. Med. 164, 642 (1986)
	75	Bacto-Agar	Bacto-Agar, 0.5mg/ml	Bacto-agar 20°C extract	From the late Prof. Elvin A. Kabat (Columbia University)	Duckworth & Yaphe, Carbohydr. Res. 16, 189 (1971)
	76	KLH-SH 1_5	KLH-SH, 0.5mg/ml, 1:5 dil. In 1XPBS	Thiolated keyhole limpet hemocyanin	From Prof. Lai-Xi Wang (University of Maryland)	Ni et al., Bioconjug Chem., 17:493-500 (2006)
	77	KLH-SH	KLH-SH, 0.5mg/ml	Thiolated keyhole limpet hemocyanin	From Prof. Lai-Xi Wang (University of Maryland)	Ni et al., Bioconjug Chem., 17:493-500 (2006)
	78	E. coli. 2630 1_5	E. coli. LPS 2630, 0.5mg/ml, 1:5 dil. In Saline	Lipopolysaccharides from Escherichia coli 0111:B4	Sigma-Aldrich	Wang, et al., Drug Dev. Res. 75:172-188, (2014)
	79	E. coli. 2630	E. coli. LPS 2630, 0.5mg/ml	Lipopolysaccharides from Escherichia coli 0111:B4	Sigma-Aldrich	Wang, et al., Drug Dev. Res. 75:172-188, (2014)
	80	E. coli. K1 1_5	E. coli. K1 CP, 0.5mg/ml, 1:5 dil. In Saline	E. coli K1 capsular polysaccharide (CP)	From the late Prof. Elvin A. Kabat (Columbia University)	Kabat et al., J. Exp. Med. 164, 642 (1986)
	81	E. coli. K1	E. coli. K1 CP, 0.5mg/ml	E. coli K1 capsular polysaccharide (CP)	From the late Prof. Elvin A. Kabat (Columbia University)	Kabat et al., J. Exp. Med. 164, 642 (1986)
	82	E. coli. K100 1_5	E. coli. K100 CP, 0.5mg/ml, 1:5 dil. In Saline	E. coli K100 capsular polysaccharide (CP)	From the late Prof. Elvin A. Kabat (Columbia University)	Kabat et al., J. Exp. Med. 164, 642 (1986)
	83	E. coli. K100	E. coli. K100 CP, 0.5mg/ml	E. coli K100 capsular polysaccharide (CP)	From the late Prof. Elvin A. Kabat (Columbia University)	Kabat et al., J. Exp. Med. 164, 642 (1986)
	84	E. coli. K92 1_5	E. coli. K92 CP, 0.5mg/ml, 1:5 dil. In Saline	E. coli K92 capsular polysaccharide	From the late Prof. Elvin A. Kabat (Columbia University)	Kabat et al., J. Exp. Med. 164, 642 (1986)
	85	E. coli. K92	E. coli. K92 CP, 0.5mg/ml	E. coli K92 capsular polysaccharide	From the late Prof. Elvin A. Kabat (Columbia University)	Kabat et al., J. Exp. Med. 164, 642 (1986)
	86	E. coli. LPS 5014 1_5	E. coli. LPS 5014, 0.5mg/ml, 1:5 dil. In Saline	Lipopolysaccharides (rough strains) from Escherichia coli J5 (Rc mutant)	Sigma-Aldrich	Wang, et al., Drug Dev. Res. 75:172-188, (2014)
	87	E. coli. LPS 5014	E. coli. LPS 5014, 0.5mg/ml	Lipopolysaccharides (rough strains) from Escherichia coli J5 (Rc mutant)	Sigma-Aldrich	Wang, et al., Drug Dev. Res. 75:172-188, (2014)
	88	S. dysenterine type 1 1_5	S. dysenterine type I O-SP, 0.5mg/ml, 1:5 dil. In Saline	Shigella dysenteriae Type 1 O-specific polysaccharide	From the late Prof. Elvin A. Kabat (Columbia University)	Pozsgay, et al., Proc Natl Acad Sci USA 104:14478–14482 (2007)
	89	S. dysenterine type 1	S. dysenterine type I O-SP, 0.5mg/ml	Shigella dysenteriae Type 1 O-specific polysaccharide	From the late Prof. Elvin A. Kabat (Columbia University)	Pozsgay, et al., Proc Natl Acad Sci USA 104:14478–14482 (2007)
	90	S.typhi LPS 1_5	S.typhi LPS7261, 0.5mg/ml, 1:5 dil. In Saline	Lipopolysaccharides from Salmonella enterica serotype typhimurium L7261	Sigma-Aldrich	Wang, et al., Drug Dev. Res. 75:172-188, (2014)
	91	S.typhi LPS	S.typhi LPS7261, 0.5mg/ml	Lipopolysaccharides from Salmonella enterica serotype typhimurium L7261	Sigma-Aldrich	Wang, et al., Drug Dev. Res. 75:172-188, (2014)
	92	hMBP 1_9	hMBP, 0.5mg/ml 1:9 dil. in 10mM HCl	Myelin Basic Protein, iodination grade (Brain, Human)	ACCURATE CHEMICAL & SCIENTIFIC CORPORATION, WESTBURY, NY	Wang, et al., Drug Dev. Res. 75:172-188, (2014)
	93	hMBP 1_3	hMBP, 0.5mg/ml 1:3 dil. in 10mM HCl	Myelin Basic Protein, iodination grade (Brain, Human)	ACCURATE CHEMICAL & SCIENTIFIC CORPORATION, WESTBURY, NY	Wang, et al., Drug Dev. Res. 75:172-188, (2014)
	94	hMBP	hMBP, 0.5mg/ml in 10mM HCl	Myelin Basic Protein, iodination grade (Brain, Human)	ACCURATE CHEMICAL & SCIENTIFIC CORPORATION, WESTBURY, NY	Wang, et al., Drug Dev. Res. 75:172-188, (2014)
	95	mMBP 1_27	mMBP, 0.5mg/ml, 1:27 dil. In 1XPBS	Myelin Basic Protein (Brain, Murine)	ACCURATE CHEMICAL & SCIENTIFIC CORPORATION, WESTBURY, NY	Wang, et al., Drug Dev. Res. 75:172-188, (2014)
	96	mMBP 1_9	mMBP, 0.5mg/ml, 1:9 dil. In 1XPBS	Myelin Basic Protein (Brain, Murine)	ACCURATE CHEMICAL & SCIENTIFIC CORPORATION, WESTBURY, NY	Wang, et al., Drug Dev. Res. 75:172-188, (2014)
	97	mMBP 1_3	mMBP, 0.5mg/ml, 1:3 dil. In 1XPBS	Myelin Basic Protein (Brain, Murine)	ACCURATE CHEMICAL & SCIENTIFIC CORPORATION, WESTBURY, NY	Wang, et al., Drug Dev. Res. 75:172-188, (2014)
	98	mMBP	mMBP, 0.5mg/ml	Myelin Basic Protein (Brain, Murine)	ACCURATE CHEMICAL & SCIENTIFIC CORPORATION, WESTBURY, NY	Wang, et al., Drug Dev. Res. 75:172-188, (2014)
	99	M0G 1_5	M0G, 1mg/ml, 1:5 dil. In 1XPBS	Myelin Oligodendrocyte Glycoprotein (Brain, Human)	ACCURATE CHEMICAL & SCIENTIFIC CORPORATION, WESTBURY, NY	Wang, et al., Drug Dev. Res. 75:172-188, (2014)
	100	M0G	M0G, 1mg/ml	Myelin Oligodendrocyte Glycoprotein (Brain, Human)	ACCURATE CHEMICAL & SCIENTIFIC CORPORATION, WESTBURY, NY	Wang, et al., Drug Dev. Res. 75:172-188, (2014)
	101	MBP1-11 1_5	MBP1-11, 1mg/ml, 1:5 dil. In 1XPBS	A synthetic peptide of human myelin basic protein(MBP), N-terminal amino acid 1-11	Present author	Wang, et al., Drug Dev. Res. 75:172-188, (2014)
	102	MBP1-11	MBP1-11, 1mg/ml	A synthetic peptide of human myelin basic protein(MBP), N-terminal amino acid 1-11	Present author	Wang, et al., Drug Dev. Res. 75:172-188, (2014)
	103	PLP139-150 1_5	PLP139-150, 1mg/ml, 1:5 dil. In 1XPBS	A synthetic peptide of human Myelin Proteolipid Protein (PLP), Amino acid residue 139-150	Present author	Wang, et al., Drug Dev. Res. 75:172-188, (2014)
	104	PLP139-150	PLP139-150, 1mg/ml	A synthetic peptide of human Myelin Proteolipid Protein (PLP), Amino acid residue 139-150	Present author	Wang, et al., Drug Dev. Res. 75:172-188, (2014)
	P1	DyeMix	Microarray scanning markers	Streptavidin-Cy3, -Cy5, and -FITC	Amashan Pharmacia, Piscataway, NJ	Wang, et al., Drug Dev. Res. 74:65-80, (2013)
	P2	Bismarck	An experimental spotting marker	Bismarck brown Y	TRIVENI INTERCHEM PVT. LTD., Gujarat , India	This report
		*HDPE: Neoglycolipids-1,2-di-O-hexadecyl-sn-glycero-3—phosphoethanolamine
